# Supplementary material
Source: publisher figshare collection journal article supplement (https://tandf.figshare.com/ndownloader/files/20709837)
Supplement: Supplementary file 1 [file 20709837]

Supplementary Material

GM (1, 1) is based on five steps:

Step 1: The initial time sequence is assumed to be as follows:

, (1)

where *x*(0) denotes the original historical time series data of population or crop yield per hectare from 1985 to 2015.

Step 2: Construct *x*(1) via a one-time accumulated generating operation of population or crop yield per hectare:

, (2)

Where , (3)

Step 3: Construct the grey differential equation of population or crop yield per hectare from 1986 to 2030:

, (4)

where is the predicted grey value complemented by the corresponding initial condition, , with model parameters a and b.

Equation (13) can then be expressed as follows:

and (5)

, (6)

Using the least square method, we can convert Eq. (14) into a matrix to calculate parameters a and b as follows:

and (7)

, (8)

Expanding Eq. (17), we obtain the following:

and (9)

, (10)

If we let , we then obtain the following equation:

(11)

Step 4: Calculate :

, (12)

Step 5: Reduce the actual predicted value:

. (13)

Where is the predicted value of population or crop yield per hectare and k is the predicted year from 1986 to 2030.
